# Supplementary material for: Effects of chemical pretreatment on the enzymatic hydrolysis of post-consumer waste viscose
Source: Royal Society of Chemistry journal article supplement (doi:10.1039/d4su00486h), 2024-01-01
Supplement: d4su00486h1.xlsx [file d4su00486h1.xlsx]

## Sheet: Sheet1
Set number	Starting materials	Pretreatment	Enzyme loading	Recovery in pretreatment	Yield in enzymatic hydrolysis
1	Pre-consumer viscose	None	0.05-0.3 g/g	-	28.6-102.4%
	Post-consumer white viscose waste				22.3-62.4%
	Post-consumer colored viscose waste				17.0-82.0%
2	Medicinal cotton (control)	None	0.01-0.15 g/g	-	22.7-71.1%
	Pre-consumer viscose	None		-	19.0-94.1%
	Post-consumer colored viscose waste	70 °C, 1 h, 5% Na2CO3		0.917	15.1-78.6%
		120 °C, 1 h, 5% Na2CO3		0.845	12.9-94.1%
		170 °C, 1 h, 5% Na2CO3		0.806	6.5-69.3%
3	Medicinal cotton (control)	None	0.05-0.15 g/g	-	31.7-50.3%
	Pre-consumer viscose	None		-	53.3-79.2%
	Post-consumer colored viscose waste	30 °C, 30 min, 15% H2SO4		1.009	23.9-68.4%
		30 °C, 30 min, 30% H2SO4		0.94	34.2-48.8%
		50 °C, 30 min, 15% H2SO4		1.022	38.1-69.5%
		50 °C, 30 min, 30% H2SO4		0.955	22.4-51.9%
4	Post-consumer colored viscose waste	70 °C, 1 h, 5% Na2CO3	0.05-0.15 g/g	0.921	39.4-73.1%
		70 °C, 1 h, 5% Na2CO3 + Gradual washing			38.6-88.5%
		30 °C, 30 min, 15% H2SO4 + Gradual washing		0.866	22.1-53.1%
