# Supplementary material for: Effects of chemical pretreatment on the enzymatic hydrolysis of post-consumer waste viscose
Source: Royal Society of Chemistry journal article supplement (doi:10.1039/d4su00486h), 2024-01-01
Supplement: d4su00486h2.pdf [file d4su00486h2.pdf]

## Appendix A

| Pretreatment conditions                           | Cellulose content (%) | Standard deviation (%) |
|---------------------------------------------------|-----------------------|------------------------|
| 15% H <sub>2</sub> SO <sub>4</sub> , 30°C, 30 min | 95.9                  | 1.1                    |
| 30% H <sub>2</sub> SO <sub>4</sub> , 30°C, 30 min | 94.6                  | 1.1                    |
| 15% H <sub>2</sub> SO <sub>4</sub> , 50°C, 30 min | 97.6                  | 1.7                    |
| 30% H <sub>2</sub> SO <sub>4</sub> , 50°C, 30 min | 96.5                  | 1.2                    |
| 5% Na <sub>2</sub> CO <sub>3</sub> , 70°C, 1h     | 90.2                  | 3.5                    |
| 5% Na <sub>2</sub> CO <sub>3</sub> , 120°C, 1h    | 86.1                  | 3.0                    |
| 5% Na <sub>2</sub> CO <sub>3</sub> , 170°C, 1h    | 86.6                  | 1.2                    |

Table A1. Cellulose content of pretreated colored post-consumer viscose based on oven dry weight

## Appendix B

| Set number | Starting materials                  | Pretreatment                                      | Enzyme loading | Recovery in pretreatment | Yield in enzymatic hydrolysis |
|------------|-------------------------------------|---------------------------------------------------|----------------|--------------------------|-------------------------------|
| 1          | Pre-consumer viscose                |                                                   |                |                          | 28.6-102.4%                   |
|            | Post-consumer white viscose waste   | None                                              | 0.05-0.3 g/g   | -                        | 22.3-62.4%                    |
|            | Post-consumer colored viscose waste |                                                   |                |                          | 17.0-82.0%                    |
| 2          | Medicinal cotton (control)          | None                                              |                | -                        | 22.7-71.1%                    |
|            | Pre-consumer viscose                | None                                              |                | -                        | 19.0-94.1%                    |
|            |                                     | 70 °C, 1 h, 5% Na <sub>2</sub> CO <sub>3</sub>    | 0.01-0.15 g/g  | 91.7%                    | 15.1-78.6%                    |
|            | Post-consumer colored viscose waste | 120 °C, 1 h, 5% Na <sub>2</sub> CO <sub>3</sub>   |                | 84.5%                    | 12.9-94.1%                    |
|            |                                     | 170 °C, 1 h, 5% Na <sub>2</sub> CO <sub>3</sub>   |                | 80.6%                    | 6.5-69.3%                     |
| 3          | Medicinal cotton (control)          | None                                              |                | -                        | 31.7-50.3%                    |
|            | Pre-consumer viscose                | None                                              |                | -                        | 53.3-79.2%                    |
|            |                                     | 30 °C, 30 min, 15% H <sub>2</sub> SO <sub>4</sub> | 0.05-0.15 g/g  | 100.9%                   | 23.9-68.4%                    |
|            | Post-consumer colored viscose waste | 30 °C, 30 min, 30% H <sub>2</sub> SO <sub>4</sub> |                | 94.0%                    | 34.2-48.8%                    |
|            |                                     | 50 °C, 30 min, 15% H <sub>2</sub> SO <sub>4</sub> |                | 102.2%                   | 38.1-69.5%                    |
|            |                                     | 50 °C, 30 min, 30% H <sub>2</sub> SO <sub>4</sub> |                | 95.5%                    | 22.4-51.9%                    |
| 4          |                                     | 70 °C, 1 h, 5% Na <sub>2</sub> CO <sub>3</sub>    |                |                          | 39.4-73.1%                    |
|            |                                     | 70 °C, 1 h, 5% Na <sub>2</sub> CO <sub>3</sub>    |                | 92.10%                   | 38.6-88.5%                    |
|            | Post-consumer colored viscose waste | Gradual washing                                   | 0.05-0.15 g/g  |                          |                               |
|            |                                     | 30 °C, 30 min, 15% H <sub>2</sub> SO <sub>4</sub> |                | 86.60%                   | 22.1-53.1%                    |
|            |                                     | Gradual washing                                   |                |                          |                               |

Table B1. Summary table of the experimental conditions (starting material, pretreatment, enzyme loading), cellulose recovery after pretreatment and glucose yield in enzymatic hydrolysis for each of the experimental sets in this study.
